# Supplementary material for: Schedule-based sequential localization in asynchronous wireless networks
Source: Springer Nature journal article supplement (doi:10.1186/1687-6180-2014-16), 2014-02-06

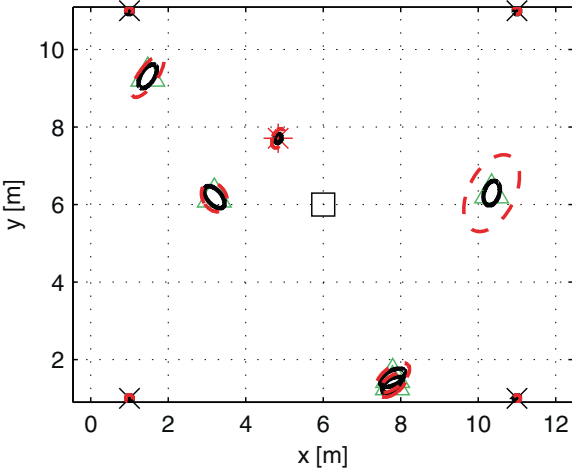

Supplement: 13634_2013_594_MOESM17_ESM.pdf [file 13634_2013_594_MOESM17_ESM.pdf]
